# Supplementary material for: Karyotype Evolution in Birds: From Conventional Staining to Chromosome Painting
Source: Genes (Basel). 2018 Mar 27;9(4):181. doi: 10.3390/genes9040181 (PMC5924523; doi:10.3390/genes9040181)
Supplement: Supplementary file 1 [file genes-09-00181-s001.xlsx]

## Sheet: Plan1
Table 1 - The diploid number, associations and fissions in chicken homologous segments (GGA1-10) in avian genomes using chicken and White Hawk probes. Seg= segment; M= microchromosome.
Ordem	Specie	2n	Association	Fissions	Intrachromosomal Rearrangements with GGA	Intrachromosomal Rearrangements with LAL	References
Struthioniformes	Rhea americana	80	-	-	-		Guttenbach et al 2003
Struthioniformes	Pterocnemia pennata	80	-	-	-		Nishida-Umehara et al 2007
Struthioniformes	Struthio camelus	80	-	-	-		Nishida-Umehara et al 2007
Struthioniformes	Casuarius casuarius	92	-	-	-		Nishida-Umehara et al 2007
Struthioniformes	Dromaius novaehollandiae	80	-	-	-		Nishida-Umehara et al 2007
Tinamiformes	Eudromia elegans	80	-	-	-		Nishida-Umehara et al 2007
Galliformes	Coturnix c. Japonica	78	GGA4/GGA4p=CJA4	-	-		Shibusawa et al 2004
Galliformes	Phasianus colchicus	82	-	GGA2=PCO3 and 6	-		Guttenbach et al 2003
Galliformes	Chrysolophus pictus	82	-	GGA2=CPI3 and 6	-		Guttenbach et al 2003
Galliformes	Lophura nycthemera	80	-	GGA2=LNY3 and 6	-		Guttenbach et al 2003
Galliformes	Chrysolophus amherstiae	-	-	GGA2=CAM3 and 6	-		Shibusawa et al 2004
Galliformes	Meleagris gallopavo	-	-	GGA2=MGA3 and 6	-		Shibusawa et al 2004
Galliformes	Tetrao urogallus	-	GGA6/GGA8=TUR5	GGA2=TUR3 and 7	-		Shibusawa et al 2004
Galliformes	Bambusicola thoracica	-	-	-	-		Shibusawa et al 2004
Galliformes	Pavo cristatus	-	GGA8/GGA9=PCR7	-	-		Shibusawa et al 2004
Galliformes	Ortalis vetula	-	-	-	-		Shibusawa et al 2004
Galliformes	Coturnix chinensis	-	-	-	-		Shibusawa et al 2004
Galliformes	Numida meleagris	-	GGA6/GGA7=NME5	-	-		Shibusawa et al 2004
Galliformes	Callipepla californica	-	-	GGA2=CCA3 and 6	-		Shibusawa et al 2004
Anseriformes	Anser anser	80	GGA4/GGA4p=AAN4	-	-		Guttenbach et al 2003
Anseriformes	Aix sponsa	80	-	-	-		Nanda et al 2011
Anseriformes	Coscoroba coscoroba	98	-	-	-		Rodrigues et al 2014
Columbiformes	Streptopelia roseogrisea	78	GGA4/GGA4p=SRO? Two associations among GGA 6,7,8 and 9=SRO?	-	-		Guttenbach et al 2003
Columbiformes	Columba livia	80	-	-	-		Derjusheva et al 2004
Charadriiformes	Larus argentatus	70	GGA5/m=LAR4 GGA6/m=LAR6 GGA7/m=LAR7 GGA8/m=LAR8 GGA9 or R3 or R6/m=LAR6 or 7	-	-		Hansmann et al 2009
Charadriiformes	Burhinus oedicnemus	42	GGA7/8=BOE5 GGA4p/m=BOE8 GGA6/m=BOE9 GGA9/m=BOE7	-	-		Nie et al 2009
Charadriiformes	Vanellus chilensis	78	GGA7/8=VCH4	-	-	-	Kretschmer et al 2015b
Eurypygiformes	Eurypyga helias	80	GGA2q/GGA5=EHE1	GGA1=EHE2 and 5 GGA2=EHE1q/p and 8 GGA5=EHE1q/p and 13	Pericentric inversion in EHE1 (GGA2q/5)	Pericentric inversion on HHE1 (GGA2seg/GGA5seg); Pericentric inversion on HHE8 (GGA2p segment); Pericentric inversion in EHE1 (GGA2q/5)	Furo et al 2015b
Gruiformes	Fulica atra	92	GGA4q/GGA5=FAT4 GGA6/GGA7=FAT5	GGA4=FAT4p, 7 and 13 GGA5=FAT5q and 12	-		Nanda et al 2011
Gruiformes	Gallinula chloropus	78	GGA4q/GGA5=GCH4 GGA6/GGA7=GCH5	GGA4=GCH4p, 7 and 13 GGA5=GCH4q and 12	-		Nanda et al 2011
Strigiformes	Bubo bubo	80	GGA4q/GGA2=BBU	GGA1=BBU3 and 4 GGA5=BBU5q and micro	-		Guttenbach et al 2003
Strigiformes	Pulsatrix perspicillata	76	GGA1/2=PPE1 GGA5/4=PPE3 GGA6/7=PPE5 GGA9/4=PPE6 GGA5/8=PPE7	GGA1=PPE1p and 4 GGA5=PPE3p and 7p	-		de Oliveira et al 2008
Strigiformes	Strix nebulosa	82	GGA4q/5seg=SNE2	GGA2=SNE3 and 5 GGA5=SNE2p and 11	-		Hansmann et al 2009
Trogoniformes	Trogon s. surrucura	82	GGA6/7=TSU4	GGA2=TSU3 and 8 GGA5=TSU6 and 11	-	Centromere repositioning or pericentric inversion on TSU3 (GGA2q), 5 (GGA4q) and 6 (GGA5q). Pericentric inversion on TSU1 (GGA1)	Degrandi et al., 2017
Accipitriformes	Harpia harpyja	58	GGA1seg/m=HHA6 GGA2seg/m=HHA3 GGA3/m/5seg=HHA2 GGA6/m=HHA8	GGA1=HHA5, 6, 19, 21 and 24 GGA2=HHA1 and 3 GGA3=HHA2p, 10 and 18 GGA5=HHA2q and 20	-		de Oliveira et al 2005
Accipitriformes	Rupornis magnirostris	68	GGA6/1seg=RMA3 GGA5q/m=RMA5 GGA5p/m=RMA5 GGA7/m=RMA8	GGA1=RMA3p/q, 6, 7, 15 and 18 GGA2=RMA2, 4 and 20 GGA3=RMA9, 13, 17 and 26 GGA5=RMA	-	-	de Oliveira et al 2013
Accipitriformes	Asturina nitida	68	GGA6/1seg=ANI3 GGA5q/m=ANI5 GGA5p/m=ANI14 GGA7/m=ANI8	GGA1=ANI 3p/q, 6, 7, 15 and 18 GGA2=ANI2, 3 and 20 GGA3=ANI9, 13, 17 and 26 GGA5=ANI5 and 14q	-	-	de Oliveira et al 2013
Accipitriformes	Buteogallus meridionallis	68	GGA1seg/6=BME3 GGA5q/m=BME5 GGA5p/m=BME14 GGA7/m=BME8	GGA1=BME 3p/q, 6, 7, 15 and 18 GGA2=BME2, 4 and 20 GGA3=BME9, 13, 17 and 26 GGA5=BME5 and 14q	-	-	de Oliveira et al 2013
Accipitriformes	Buteo buteo	68	GGA1seg/6=BBU GGA2seg/m=BBU GGA3/m=BBU GGA5seg /m=BBU GGA7/m=BBU GGA9/m=BBU	GGA1=BBU6p, 7, 12, 21, 22, 23, 26 and 27 GGA2=BBU1, 3q and 24 GGA3=BBU8p/q, 16q, 19 and 25 GGA5=BBU5q and 17	-		Nie et al 2015
Accipitriformes	Gyps himalayensis	66	GGA2seg/m=GHI3 GGA3seg/m=GHI16 GGA5/m=GHI11 GGA7/m=GHI4 GGA9/m=GHI5	GGA1=GHI7, 12, 21, 22, 23, 26 and 28 GGA2=GHI1, 3 and 24 GGA3=GHI8, 16, 19 and 25 GGA5=GHI11 and 17	-		Nie et al 2015
Accipitriformes	Nisaetus nipalensis orientalis	66	GGA2seg/m=NNI2 GGA3seg/m=NNI17 GGA6/m=NNI4 GGA9/m=NNI9	GGA1=NNI6 13, 15, 19, 21, 24 and 28 GGA2=NNI2q, 3 and 22 GGA3=NNI10, 12, 17q and 20 GGA5=NNI11 and 16	-		Nishida et al 2013
Accipitriformes	Gymnogyps californianus	80	-	-	-		Raudsepp et al 2002
Accipitriformes	Cathartes aura	80	-	-	-	-	Tagliarini et al 2011
Accipitriformes	Leucopternis albicollis	66	GGA6/1seg=LAL3 GGA5q/m=LAL5 GGA5p/m=LAL14 GGA7/m=LAL8	GGA1=LAL3p/3q, 6, 7, 15 and 18 GGA2=LAL2, 4 and 20 GGA3=LAL9, 13, 17 and 26 GGA5=LAL5 and 14q	-		de Oliveira et al 2010
Accipitriformes	Gyps rueppelli	66	GGA6/m=GRU4 GGA7/m=GRU6 GGA9/m=GRU9 GGA10/m=GRU18	GGA1=GRU7, 12, 15, 19, 20 and 22 GGA2=GRU2, 3 and 23 GGA3=GRU 8, 16q, 21 and 24 GGA5=GRU14q and 17	-		Nanda et al 2006
Accipitriformes	Gyps fulvus	66	GGA2/m=GFU3 GGA3/m=GFU8 and 16 GGA5/m=GFU11 GGA7/m=GFU4 GGA9/m=GFU5	GGA1=GFU7, 12, 21, 22, 23, 26 and 28 GGA2=GFU1, 3 and 24 GGA3=GFU8, 16, 19 and 25 GGA5=GFU 11 and 17	-		Nie et al 2015
Accipitriformes	Gypaetus barbatus	60	GGA1/GGA3= GBA8 GGA1/m= GBA12 GGA2/m= GBA1 GGA2/m= GBA14 GGA5/m= GBA15 GGA6/m=GBA4 GGA7/m=GBA6 GGA9/m=GBA5 GGA10/m=GBA9	GGA1=GBA7, 8p, 11 and 12q GGA2=GBA 1q, 2, 14q and 23q GGA3=GBA8q, 13, 21q and 22q GGA5=GBA15q and 20	-		Nanda et al 2006
Falconiformes	Falco tinnunculus	52	GGA2/m=FTI2 and 4 GGA4/m=FTI1 and 14 GGA5/m=FTI7 and 10 GGA6/m=FTI8 GGA7/m=FTI9	GGA1=FTI3 and 5 GGA2=FTI2 and 4 GGA3=FTI6 and 12 GGA5=FTI7 and 10	-		Nishida et al 2008
Falconiformes	Falco peregrinus	50	GGA2/m=FPE3 and 5 GGA4/m=FPE2 and 13 GGA5/m=FPE9 GGA6/m=FPE8 GGA7/m/5/m=FPE1	GGA1=FPE4 and 6 GGA2=FPE3 and 5 GGA3=FPE7 and 11 GGA5=FPE1q and 9	-		Nishida et al 2008
Falconiformes	Falco columbarius	40	GGA2/5/m=FCO3 GGA3/2/m=FCO4 GGA3/4/m= FCO1 GGAm/4= FCO8 GGA7/m/5/m= FCO5 GGA8/6/m= FCO6	GGA2=FCO3q and 4q GGA3=FCO1p and 4p GGA5=FCO3p and 5q	-		Nishida et al 2008
Falconiformes	Pandion haliaetus	74	GGA1seg/9=PHA1 GGA1seg/m=PHA2 GGA1seg/4=PHA4 GGA1seg/6=PHA3	GGA1=PHA1q, 2q, 3p, 4q, 5p, 23 and 24 GGA2=PHA9q and 27 GGA3=PHA6, 11, 13 and 21 GGA4=PHA4p, 8 and 18 GGA5=PHA15 and 19	-		Nishida et al 2014
Psittaciformes	Nymphicus hollandicus	72	GGA6/7=NHO5 GGA4/8/9=NHO4	GGA1=NHO3 and 6 GGA9=NHO4p and 10	Paracentric inversion in NHO5 (GGA6/7)		Nanda et al 2007
Psittaciformes	Agapornis roseicollis	48	GGA6/7=ARO6 GGA1/4=ARO4 GGA8/9=ARO5 GGA2/9=ARO9	GGA1=ARO3 and 4q GGA2=ARO2 and 9q GGA9=ARO5q and 9q	Paracentric inversion in ARO6 (GGA6/7)		Nanda et al 2007
Psittaciformes	Melopsittacus undulatus	62	GGA5/6/7=MUN4 GGA4/8/9=MUN5	GGA1=MUN3 and 6 GGA6=MUN4p and 8p	Pericentric inversion in MUN5 (GGA4/8/9)		Nanda et al 2007
Psittaciformes	Ara macao	62-64	GGA1seg/4q=AMA1 GGA6/7=AMA6 GGA8/9=AMA7	GGA1=AMA1, 4 and 9	Paracentric inversion in AMA6 (GGA6/7) Pericentric inversion in AMA7 (GGA8/9)		Seabury et al 2013
Psittaciformes	Ara chloropterus	70	GGA1seg/4q=ACH1 GGA6/7=ACH6 GGA8/9=ACH7	GAA1=ACH1q and 4 GGA2=ACH2 and 11	Paracentric inversion in ACH6 (GGA6/7) Pericentric inversion in ACH7 (GGA/8/9)	Pericentric inversions or centromeric shifts centromere repositioning in ACH2 (GGA2), ACH3 (GGA3) ACH4 (GGA1q).	Furo et al 2015
Psittaciformes	Anodorhynchus hyacinthinus	70	GGA1seg/4q=AHY1 GGA6/7=AHY6 GGA8/9=AHY7	GGA1=AHY1q and 4	Paracentric inversion in AHY6 (GGA6/7)	Pericentric inversions or centromeric shifts centromere repositioning in AHY2 (GGA2), AHY3 (GGA3), AHY4 (GGA1q), AHY8 (GGA4p)	Furo et al 2015
Psittaciformes	Psittacus erithacus	62-64	GGA1seg/4=PER1 GGA6/7=PER6 GGA8/9=PER7	GGA1=PER1q and 4	Paracentric inversion in PER6 (GGA6/7) Pericentric inversion in PER7 (GGA/8/9)		Seibold-Torres et al 2016
Passeriformes	Fringilla coelebs	80	-	GGA1=FCO3 and 4	-		Derjusheva et al 2004
Passeriformes	Turdus iliacus	80	-	GGA1=TIL2 and 5	-		Derjusheva et al 2004
Passeriformes	Turdus merula	80	-	GGA1=TME2 and 5	-		Guttenbach et al 2003
Passeriformes	Turdus rufiventris	78	-	GGA1=TRU2 and 5	-	Paracentric and pericentric in TRU2 (GGA1q)	Kretschmer et al 2014
Passeriformes	Turdus albicollis	78	-	GGA1=TAL2 and 5	-	Paracentric and pericentric in TAL2 (GGA1q)	Kretschmer et al 2014
Passeriformes	Pica pica	80		GGA1=PPI3 and 4	-		Nanda et al 2011
Passeriformes	Garrulus glandarius	78	-	GGA1=GGL2 and 4	-		Nanda et al 2011
Passeriformes	Sitta europaea	80	GGA8/9=SEU7 GGA5/10=SEU6	GGA1= SEU2 and 5 GGA5=SEU6q and 10	-		Nanda et al 2011
Passeriformes	Sylvia atricapilla	74	GGA4q/GGA4p=SAT5	GGA1=SAT2 and 4	-		Nanda et al 2011
Passeriformes	Periparus ater	80	-	GGA1=PAT2 and 4	-		Nanda et al 2011
Passeriformes	Parus major	80	-	GGA1=PMA2 and 4	-		Nanda et al 2011
Passeriformes	Saltator aurantiirostris	80	-	GGA1=SAU2 and 5	-	Paracentric and pericentric in SAU2 (GGA1q)	dos Santos et al 2015
Passeriformes	Saltator similis	80	-	GGA1=SSI2 and 5	-	Paracentric and pericentric in SSI2 (GGA1q)	dos Santos et al 2015
Passeriformes	Taeniopygia guttata	80	-	GGA1=TGU2 and 5	-	Paracentric and pericentric in TGU2 (GGA1q); pericentric inversion in TGU1 (GGA2) and in TGU5 (GGA1p)	dos Santos et al 2017
Passeriformes	Serinus canaria	80	-	GGA1=SCA2 and 5	-	Paracentric and pericentric inversions in SCA2 (GGA1q) and pericentric inversion in SCA5 (GGA1p)	dos Santos et al 2017
Passeriformes	Elaenia spectabilis	80	-	GGA1=ESP2 and 5	-	Paracentric and pericentric inversions in ESP2 (GGA1q) and pericentric inversion in ESP5 (GGA1p)	Kretschmer et al 2015
Passeriformes	Pitangus sulphuratus	80	-	GGA1=PSU3 and 5	-	Paracentric and pericentric inversions in PSU3 (GGA1q) and pericentric inversion in PSU5 (GGA1p)	Rodrigues et al (In press)
Passeriformes	Serpophaga subcristata	82	-	GGA1=SSU3 and 5	-	Paracentric and pericentric inversions in SSU3 (GGA1q) and pericentric inversion in SSU5 (GGA1p)	Rodrigues et al (In press)
Passeriformes	Satrapa icterophrys	82	-	GGA1=SIC2 and 5 GGA2=SIC3 and 7	-	Paracentric and pericentric inversions in SIC2 (GGA1q) and pericentric inversion in SIC5 (GGA1p)	Rodrigues et al (In press)
References
Degrandi TM, del Valle Garnero A, O'Brien PCM, Ferguson-Smith MA, Kretschmer R, de Oliveira EHC, Gunski RJ (2017) Chromosome Painting in Trogon s. surrucura (Aves, Trogoniformes) Reveals a Karyotype Derived by Chromosomal Fissions, Fusions, and Inversions. Cytogenetic and Genome Research 151:208-215.
de Oliveira EHC, Tagliarini MM, Rissino JD, Pieczarka JC, Nagamachi CY, et al. (2010) Reciprocal chromosome painting between white hawk (Leucopternis albicollis) and chicken reveals extensive fusions and fissions during karyotype evolution of Accipitridae (Aves, Falconiformes). Chromosome Res 18: 349–355.
de Oliveira EHC, Habermann F, Lacerda O, Sbalqueiro IJ, Wienberg J, et al. (2005) Chromosome reshuffling in birds of prey: the karyotypes of the world’s largest eagle (Harpy eagle, Harpia harpyja) compared to that of the chicken (Gallus gallus). Chromosoma 114: 338–343.
de Oliveira EHC, Tagliarini MM, dos Santos MS, O’Brien PCM, Ferguson-Smith MA (2013) Chromosome Painting in Three Species of Buteoninae: A Cytogenetic Signature Reinforces the Monophyly of South American Species. PLOS one 8(7): e70071.
de Oliveira EH, de Moura SP, dos Anjos LJ, Nagamachi CY, Pieczarka JC, et al. (2008) Comparative chromosome painting between chicken and spectacled owl (Pulsatrix perspicillata): implications for chromosomal evolution in the Strigidae (Aves, Strigiformes). Cytogenet Genome Res 122: 157–162.
Derjusheva S, Kurganova A, Haberman F, Gaginskaia E (2004) High chromosome conservation detected by comparative chromosome painting in chicken, pigeon and passerine birds. Chromosome Res 12: 715–723.
dos Santos MS, Kretschmer R, Silva FAO, Ledesma MA, O’Brien PCM, Ferguson-Smith MA, Garnero ADV, Gunski RJ, de Oliveira EHC (2015) Intrachromosomal rearrangements in two representatives of the genus Saltator (Thraupidae, Passeriformes) and a case of polymorphism in Z Chromosome. Genetica.
dos Santos MS, Kretschmer R, Frankl-Vilches C, Bakker A, Gahr M, O’Brien PCM, Ferguson-Smith MA, de Oliveira EHC (2017) Comparative Cytogenetics between Two Important Songbird, Models: The Zebra Finch and the Canary. PLoS ONE 12(1): e0170997.
Furo IdO, Kretschmer R, O’Brien PCM, Ferguson-Smith MA, de Oliveira EHC (2015) Chromosomal Diversity and Karyotype Evolution in South American macaws (Psittaciformes, Psittacidae). PLoS ONE 10(6): e0130157.
Furo IdO, Monte AA, dos Santos MdS, Tagliarini MM, O´Brien PCM, Ferguson-Smith MA, et al. (2015) Cytotaxonomy of Eurypyga helias (Gruiformes, Eurypygidae): First Karyotypic Description and Phylogenetic Proximity with Rynochetidae. PLoS ONE 10(12): e0143982.
Guttenbach M, Nanda I, Feichtinger W, Masabanda JS, Griffin DK, et al. (2003) Comparative chromosome painting of chicken autosomal paints 1–9 in nine different bird species. Cytogenet Genome Res 103: 173–184.
Hansmann T, Nanda I, Volobouev V, Yang F, Schartl M, Haaf T, et al. Cross-species chromosome painting corroborates microchromosome fusion during karyotype evolution of birds. Cytogenet Genome Res. 2009;126:281–304
Kretschmer R, Gunski RJ, Garnero ADV, Furo IdO, O’Brien PCM, Ferguson-Smith MA, de Oliveira EHC (2014) Molecular Cytogenetic Characterization of Multiple Intrachromosomal Rearrangements in Two Representatives of the Genus Turdus (Turdidae, Passeriformes). PLoS ONE 9(7): e103338.
Kretschmer R, de Oliveira EHC, dos Santos MS, Furo IdO, O’Brien PCM, Ferguson-Smith MA, Garnero ADV, Gunski RJ (2015a) Chromosome mapping of the large elaenia (Elaenia spectabilis): evidence for a cytogenetic signature for passeriform birds? Biological Journal of the Linnean Society 115(2): 391–398.
Kretschmer R, Gunski RJ, Garnero ADV, O’Brien PCM, Ferguson-Smith MA, de Freitas OTR, de Oliveira EHC (2015b) Chromosome Painting in Vanellus chilensis: Detection of a Fusion Common to Clade Charadrii (Charadriiformes). Cytogenet Genome Res 146:58-63.
Nanda I, Benisch P, Fetting D, Haaf T, Schmid M. 2011. Synteny conservation of chicken macrochromosomes 1–10 in different Avian lineages revealed by cross-species chromosome painting. Cytogenetic and Genome Research 132: 165–181.
Nanda I, Karl E, Griffin DK, Schartl M, Schmid M. 2007. Chromosome repatterning in three representative parrots (Psittaciformes) inferred from comparative chromosome painting. Cytogenetic and Genome Research 117: 43–53.
Nanda I, Karl E, Volobouev V, Griffin DK, Scharlt M et al. 2006. Extensive gross genomic rearrangements between chicken and Old World vultures (Falconiformes, Accipitridae). Cytogenet Genome Res 112: 286–295.
Nie W, Patricia C. M. O’Brien, Fu, Wang J, Su W, He, Bed’Hom B, Volobouev V, Ferguson-Smith MA, Dobigny G, Yang F (2015) Multidirectional chromosome painting substantiates the occurrence of extensive genomic reshuffling within Accipitriformes. BMC Evolutionary Biology 15:205.
Nie W, O’Brien PCM, Ng BL, Fu B, Volobouev V, Carter NP, Ferguson-Smith MA, Yang F. 2009. Avian comparative genomics: reciprocal chromosome painting between domestic chicken (Gallus gallus) and the stone curlew (Burhinus oedicnemus, Charadriiformes) – an atypical species with low diploid number. Chromosome Research 17: 99–113.
Nishida-Umehara C, Tsuda Y, Ishijima J, Ando J, Fujiwara A, Matsuda Y, Griffin DK. 2007. The molecular basis of chromosome orthologies and sex chromosomal differentiation in palaeognathous birds. Chromosome Research 15: 721–734.
Nishida C, Ishishita S, Yamada K, Griffin DK, Matsuda Y (2014) Dynamic chromosome reorganization in the osprey (Pandion haliaetus, Pandionidae, Falconiformes): relationship between chromosome size and the chromosomal distribution of centromeric repetitive DNA sequences. Cytogenet Genome Res. 2014;142:179–89.
Nishida C, Ishijima J, Kosaka A, Tanabe H, Habermann FA, Griffin DK, et al. Characterization of chromosome structures of Falconinae (Falconidae, Falconiformes, Aves) by chromosome painting and delineation of chromosome rearrangements during their differentiation. Chromosome Res. 2008;16:171–81.
Nishida C, Ishijima J, Ishishita S, Yamada K, Griffin DK, Yamazaki T, et al. Karyotype reorganization with conserved genomic compartmentalization in dot-shaped microchromosomes in the Japanese mountain hawk-eagle (Nisaetus nipalensis orientalis, Accipitridae). Cytogenet Genome Res. 2013;141:284–94.
Rodrigues BS, de Assis MFL, O’Brien PCM, . Ferguson-Smith MA, de Oliveira EHC. 2014. Chromosomal studies on Coscoroba coscoroba (Aves: Anseriformes) reinforce the Coscoroba–Cereopsis clade. Biological Journal of the Linnean Society, 111, 274–279.
Rodrigues BS, Kretschmer R, Gunski RJ, Garnero ADV, O'Brian PCM, Ferguson-Smith MA, de Oliveira EHC (In press) Chromosome painting in tyrant flycatchers confirms a set of paracentric inversions is shared by Tyrannidae and Passerini (Aves, Passeriformes). Cytogenetic and Genome Research.
Shibusawa M, Nishibori M, Nishida-Umehara C, Tsudzuk M, Masaband J, Griffin DK, MatsudaY. Karyotypic evolution in the Galliformes: An examination of the process of karyotypic evolution by comparison of the molecular cytogenetic findings with the molecular phylogeny. Cytogenet Genome Res 106:111–119 (2004).
Seabury CM, Dowd SE, Seabury PM, Raudsepp T, Brightsmith DJ, Liboriussen P, Halley Y, Fisher CA, Owens E, Viswanathan G, Tizard IR. 2013. A multiplatform draft de novo genome assembly and comparative analysis for the Scarlet Macaw (Ara macao). PLoS ONE 8: e62415.
Seibold-Torres C, Owens E, Chowdhary R, Ferguson-Smith MA, Tizard I, Raudsepp T. Comparative Cytogenetics of the Congo African Grey Parrot (Psittacus erithacus). Cytogenet Genome Res. 2015;147(2-3):144-53.
Tagliarini MM, O’Brien PCM, Ferguson-Smith MA, de Oliveira EHC (2011) Maintenance of syntenic groups between Cathartidae and Gallus gallus indicates symplesiomorphic karyotypes in new world vultures. Genetics and Molecular Biology 34 (1) 80–83.
